1 **Repeated blast mild traumatic brain injury and oxycodone self-administration produce**  
2 **interactive effects on neuroimaging outcomes**

3  
4 Matthew J. Muehl<sup>1,3</sup>, Breanna Glaeser<sup>1,3</sup>, Alok S. Shah<sup>4,5</sup>, Rachel Chiariello<sup>4,5</sup>, Natalie N.  
5 Nawarawong<sup>1,3</sup>, Brian D. Stemper<sup>2,3,4,5</sup>, Matthew D. Budde<sup>3,4,5</sup>, Christopher M. Olsen<sup>1,3\*</sup>

6  
7 <sup>1</sup>Department of Pharmacology and Toxicology, Medical College of Wisconsin, 8701 Watertown  
8 Plank Rd., Milwaukee, WI 53226, USA; <sup>2</sup>Joint Department of Biomedical Engineering,  
9 Marquette University, 1515 W. Wisconsin Ave, Milwaukee WI, 53233, USA and Medical  
10 College of Wisconsin, 8701 Watertown Plank Rd., Milwaukee, WI 53226, USA; <sup>3</sup>Neuroscience  
11 Research Center, Medical College of Wisconsin, 8701 Watertown Plank Rd., Milwaukee, WI  
12 53226, USA; <sup>4</sup>Department of Neurosurgery, Medical College of Wisconsin, 8701 Watertown  
13 Plank Rd., Milwaukee, WI 53226, USA; <sup>5</sup>Clement J. Zablocki Veterans Affairs Medical Center,  
14 5000 W National Ave, Milwaukee, WI 53295, USA

15  
16  
17  
18  
19 \*Corresponding author:  
20 Christopher M. Olsen, PhD  
21 Medical College of Wisconsin  
22 8701 Watertown Plank Road, Milwaukee, WI 53226, USA  
23 Phone: (414) 955-7629  
24 Email: [colsen@mcw.edu](mailto:colsen@mcw.edu)

25  
26 Running title: Neuroimaging of mild TBI and oxycodone

27 Table of Contents title: Repeated blast mild TBI interacts in neuroimaging outcomes

28  
29 Keywords: opioid, mild traumatic brain injury, extinction, drug seeking, MRI

30

## 31 **Abstract**

32 Traumatic brain injury (TBI) and drug addiction are common comorbidities, but it is unknown if  
33 the neurological sequelae of TBI contribute to this relationship. We have previously reported  
34 elevated oxycodone seeking after drug self-administration in rats that received repeated blast TBI  
35 (rbTBI). TBI and exposure to drugs of abuse can each change structural and functional  
36 neuroimaging outcomes, but it is unknown if there are interactive effects of injury and drug  
37 exposure. To determine the effects of TBI and oxycodone exposure, we subjected rats to rbTBI  
38 and oxycodone self-administration and measured drug seeking and several neuroimaging  
39 measures. We found interactive effects of rbTBI and oxycodone on fractional anisotropy (FA) in  
40 the nucleus accumbens (NAc), and that FA in the medial prefrontal cortex (mPFC) was  
41 correlated with drug seeking. We also found an interactive effect of injury and drug on  
42 widespread functional connectivity and regional homogeneity of the BOLD response, and that  
43 interhemispheric functional connectivity in the infralimbic medial prefrontal cortex positively  
44 correlated with drug seeking. In conclusion, rbTBI and oxycodone self-administration had  
45 interactive effects on structural and functional MRI measures, and correlational effects were  
46 found between some of these measures and drug seeking. These data support the hypothesis that  
47 TBI and opioid exposure produce neuroadaptations that contribute to addiction liability.

48

## 49 **Introduction**

50 Traumatic brain injury (TBI) and opioid abuse have each reached epidemic proportions. An  
51 estimated 2.4 million Americans suffer a TBI each year <sup>1</sup>, and in 2017 there were over 47,000  
52 deaths due to opioid overdose <sup>2</sup>. The incidence of TBI among veterans of the military has been  
53 approximated at 30% <sup>3</sup>, with blast injury causing the overwhelming majority of TBIs in combat  
54 settings. Co-morbidity between non-severe TBI and substance abuse has been found in numerous  
55 civilian and military epidemiological studies <sup>4-10</sup>, and there is evidence that opioid abuse may be  
56 particularly prevalent following TBI <sup>11, 12</sup>. For example, in a study of >40,000 Air Force  
57 personnel, those that sustained mild TBI (compared to non-brain injuries) had elevated hazard  
58 ratios for several drugs of abuse <sup>5</sup>. Furthermore, the hazard ratio for opioids was higher than all  
59 other drugs of abuse in the 18 months following injury (including alcohol) <sup>5</sup>. Despite extensive  
60 evidence of increased substance abuse disorder following TBI and high rates of opioid  
61 prescriptions to veterans and civilians that sustain TBI, little is known about how neurological  
62 damage associated with TBI may exacerbate opioid addiction liability.

63

64 We have previously demonstrated that our blast model of mild TBI leads to enduring  
65 microstructural changes in the medial prefrontal cortex<sup>13</sup>, a brain region critically involved in  
66 drug seeking in humans and rodent models (reviewed in<sup>14-16</sup>). We have also found that repeated  
67 blast mild TBI (rbTBI) persistently elevated levels of oxycodone seeking, despite similar levels  
68 of prior drug self-administration<sup>17</sup>. In the current study, we hypothesized that rbTBI and  
69 oxycodone self-administration would lead to persistent changes in structure and/or function of  
70 the medial prefrontal cortex which may also extend to other aspects of mesocorticolimbic  
71 circuitry that would be associated with elevated drug seeking. To test this hypothesis, rats  
72 underwent rbTBI, oxycodone self-administration, and drug seeking sessions. Structural and  
73 functional MRI were performed at acute and chronic timepoints (1- and 7- weeks post-injury,  
74 respectively).

75

## 76 **Methods**

77 An overview and timeline of experimental procedures is found in Fig 1A.

78

### 79 *Animals*

80 Male Sprague Dawley rats (Harlan/Envigo, Madison, WI, USA) arrived at the Zablocki Veterans  
81 Affairs Medical Center (ZVAMC) and were housed in pairs. Three days after the final blast or  
82 sham exposure, rats were transferred from the ZVAMC to Medical College of Wisconsin  
83 (MCW, approximately 5 miles away). Upon arrival at MCW, rats were singly housed for the  
84 remainder of the study. Food and water were provided ad libitum throughout the study, except  
85 when rats were in the behavioral apparatus. Animals were housed under a reverse light cycle  
86 (lights off 0730-1930), and experiments were conducted during the dark period. Experiments  
87 were conducted 5 days/week by experimenters blinded to the treatment condition. All  
88 experiments were conducted in compliance with the Institutional Animal Care and Use  
89 Committee (IACUC) at MCW and ZVAMC (protocol number: AUA 2816).

90

### 91 *Repeated blast exposure*

92 Rats were exposed to repeated blast overpressure or repeated sham conditions as described in<sup>13</sup>,  
93<sup>17-19</sup>. During blast or sham treatment, rats were maintained under anesthesia with a continuous  
94 delivery of 1.5% isoflurane and administered Rimadyl (carprofen, 5 mg/kg, s.c., Zoetis Inc,  
95 Kalamazoo, MI, USA). The torso of the rat was shielded with a metal cylinder, earplugs were  
96 inserted, and the head was restrained to prevent injury from rotational acceleration<sup>13</sup>. Blast-  
97 exposed rats were positioned 17 cm from the end of a custom shock tube (3.6 cm inner diameter,  
98 3.0 m driven section and 0.3 m driver section with Mylar membrane between the driver and

99 driven sections) and 18 deg off axis from the shock tube to prevent interaction of the head with  
100 exhaust gases. Blast overpressure (450 kPa, 80 kPa\*ms) was produced by pressurizing the driver  
101 section with helium until the membrane ruptured. Sham-exposed rats were subjected to the same  
102 procedures but were placed outside the overpressure shockwave. Following exposure, rats were  
103 placed on a heating pad and observed until return of righting reflex. Time from initiation of  
104 anesthesia prior to blast exposure until return of the righting reflex was quantified as ‘recovery  
105 time’. Following recovery, rats were transferred back to their home cage, and periodically  
106 observed for 6 h. This procedure was conducted daily for 3 days as a repeated blast injury model.  
107 Sham-exposed rats received sham procedures daily for 3 days. Experimenters were blind to  
108 group assignment during subsequent phases of experiments.

109

### 110 *Jugular catheterization surgery*

111 Jugular catheterization was performed as described<sup>17, 20, 21</sup>. Rats were anesthetized with  
112 isoflurane (3–5% induction, 1–3% maintenance), and a silicone catheter (Silastic, ID: 0.51 mm,  
113 OD: 0.94 mm; Dow Corning, Auburn, MI, USA) was implanted into the right jugular vein and  
114 exited via the interscapular region. The catheter was connected to a cannula assembly: a 22-  
115 gauge stainless steel cannula (Plastics One, Roanoke, VA, USA) mounted on a base made from  
116 dental acrylic and nylon mesh, which was implanted subcutaneously. At the start of the surgery  
117 and the following day, Rimadyl (carprofen, 5 mg/kg, s.c. Zoetis Inc) was given. Catheters were  
118 flushed daily with 0.2 mL of heparinized saline (30 units/mL) and cefazolin (100 mg/mL). Rats  
119 recovered for at least 1 week prior to the start of the drug self-administration experiments.

120

### 121 *Food training*

122 Food training and oxycodone self-administration were performed as described in<sup>17</sup>. Food and  
123 oxycodone self-administration and the seeking test all took place in operant conditioning  
124 chambers (31.8 × 25.4 × 26.7 cm, Med Associates, Fairfax, VT, USA) which were enclosed in  
125 sound-attenuating boxes. Chambers were equipped with two retractable levers on either side of a  
126 central food receptacle on the right wall, cue lights above each lever and a house light located on  
127 the left wall near the ceiling. Computer-controlled infusion pumps held syringes that were  
128 connected to tubing and liquid swivels. Sound attenuating boxes had a software-controlled  
129 exhaust fan.

130

131 Rats began by learning to self-administer food (fruit punch flavored 45 mg sucrose tablets,  
132 LabDiet, St. Louis, MO, USA) without food restriction. Each session lasted for 2 h/day unless  
133 the maximum number of rewards (64 sucrose pellets) was met prior to the conclusion of the 2 h.

134 At the beginning of each session, the fan was turned on, both levers were extended, and a sucrose  
135 pellet was delivered. Rats were first trained on a fixed ratio (FR)-1 schedule of reinforcement,  
136 with a single press on the active lever resulting in sucrose pellet delivery. After meeting criteria  
137 (three consecutive days with  $\geq 50$  rewards earned and  $\geq 70\%$  of total lever presses on the active  
138 lever, 4 day minimum), rats performed a single food self-administration session on an FR-2  
139 schedule of reinforcement (2 active lever presses required per reward).

140

141 The active lever was assigned to be on either the left or right side, and lever assignment was  
142 counterbalanced between rats within each group. After reward delivery, a 10 s timeout began,  
143 and the cue light above the active lever was illuminated for 5 s. During the timeout period, active  
144 and inactive lever responses were recorded but had no programmed consequence. Throughout  
145 the entire session, responses on the inactive lever were recorded but also had no programmed  
146 consequence.

147

#### 148 *Oxycodone self-administration and seeking*

149 After completion of food training, rats in the rbTBI and sham groups were further divided into  
150 those that self-administered oxycodone or received yoked infusions of saline. Each yoked saline  
151 rat was matched to a “master” rat from the same cohort. When the “master” rat earned an  
152 infusion of oxycodone, the yoked rat received an infusion of saline at the exact same time  
153 (computer controlled). Thus, the infusion history between the “master” and “yoke” rats is  
154 identical, controlling for the potential influence of infusions. Yoked saline rats still received cue  
155 light presentation in response to completing the response requirements. The infusion volume and  
156 time varied for each rat to ensure the appropriate dose was delivered from the stock solution  
157 (e.g., a 300 g rat received a 40  $\mu$ L infusion over 1.6 s) and yoked saline rats received weight-  
158 corrected volumes of saline. This phase consisted of 10 daily 2-h sessions (maximum 96  
159 infusions/session): 5 d each on FR-2 and FR-4 schedules of reinforcement. Catheter patency was  
160 determined after completion of the self-administration sessions using Brevital (methohexital, 9  
161 mg/kg, i.v.; JHP Pharmaceuticals, Rochester, MI, USA) and any rat that did not meet criteria for  
162 patency (sedation within 10 s) was removed from the study. Three days after completion of the  
163 10-day oxycodone self-administration (or yoked saline) phase, all rats were placed back into the  
164 operant conditioning chambers for a drug seeking test under extinction conditions. Completion  
165 of the FR-4 schedule resulted in saline infusion and cue delivery for all animals (i.e., yoked  
166 saline animals were no longer yoked).

167

#### 168 *Magnetic Resonance Imaging (MRI)*

169 In vivo magnetic resonance imaging was performed on a Bruker 9.4 T Biospec System. A  
170 Bruker Biospin 4-channel surface coil array was used for signal reception and transmission was  
171 achieved via a 72 mm diameter quadrature volume coil. Heart rate (ECG), core temperature, and  
172 respiration were monitored continuously. Anesthesia was induced with isoflurane (3.0%), which  
173 was tapered to 0% after initiation of constant tail vein infusion of dexmedetomidine.  
174 Dexmedetomidine was delivered via constant tail vein infusion (initial concentration: 50  
175  $\mu\text{g}/\text{kg}/\text{hr}$ ) and was titrated to maintain anesthetic depth as determined by ECG, body temperature,  
176 and respiratory rate. Anesthetized rats were secured to a custom-made temperature-controlled  
177 cradle to minimize motion. A high-resolution anatomical image was acquired with an isotropic  
178 resolution of  $134 \mu\text{m}^3$ . For diffusion imaging, a 4-shot spin-echo echo planar imaging (DW-EPI)  
179 sequence was used as described previously<sup>22</sup> with  $\text{TR}=2000$  and  $\text{TE}=23$  ms, including fat  
180 saturation using both chemical shift-selective saturation and gradient reversal of the refocusing  
181 pulse slice. Thirty slices covered the entire brain at an in-plane resolution of  $0.30 \times 0.30 \text{ mm}^2$ ,  
182 slice thickness of 0.8 mm and 0.3 mm slice gap. Two signal averages were used to acquire 60  
183 unique diffusion directions<sup>23</sup> at each b-value of 250, 1000, and 2000  $\text{s}/\text{mm}^2$  with 8 non-  
184 diffusion-weighted images. For resting state functional MRI, 200 images were acquired at a  
185 temporal resolution of 3 sec using single-shot gradient echo EPI at the identical spatial  
186 resolution. Three images were acquired for each repetition at echo times of 16.5, 33.1, and 49.6  
187 ms, and each run was repeated 3 times for a total of 30 minutes for fMRI data acquisition. To  
188 examine for any evidence of overt injury or hemorrhage, a 3D multiple echo acquisition with  
189  $0.175 \text{ mm}^3$  isotropic voxels ( $\text{TR}=50$  ms) was acquired with 10 echo times between 2.2 and 24.9  
190 ms. Across all animals, no hemorrhage was evident based on visual inspection.

191

## 192 *Statistical Analysis*

193 Statistical tests were performed using Prism 8 (GraphPad, San Diego, CA, USA) or SPSS  
194 Statistics 24 (IBM, Inc.) software. Data were analyzed using two-way mixed model ANOVAs  
195 (session: within-subjects factors, experimental group: between-group factor) with Holm-Sidak  
196 post hoc tests. ANOVAs were performed using ranked data if data did not fit a normal  
197 distribution as determined by D'Agostino & Pearson tests. Correlational analyses were  
198 performed using linear regressions (Spearman rank correlations if data did not fit a normal  
199 distribution) followed F tests to determine if slopes were significantly different from zero.  
200 Differences were considered significant when  $p \leq 0.05$ .

201

## 202 **Results**

203 *Behavioral measures*



204 Repeated blast TBI resulted in shorter recovery time ( $36.6 \pm 8.1$  sec faster) from anesthesia  
 205 compared to sham treated rats ( $F(1, 38)=20.26, \eta^2=0.20, p<0.0001$ ), but there was no effect of  
 206 blast exposure number or interaction of blast with exposure number (both  $\eta^2<0.10, p>0.39$ ). On  
 207 week three following rbTBI or sham treatment, rats underwent food self-administration training.  
 208 Food self-administration did not differ between rats exposed to rbTBI and sham (main and  
 209 interaction effects of rbTBI all  $\eta^2<0.045, p>0.39$ ; Fig 1B). These data indicate that there was no  
 210 impact of injury on the ability to acquire and perform this task, a critical consideration in TBI  
 211 research that utilizes operant conditioning<sup>24</sup>. Next, rats either self-administered oxycodone or  
 212 received yoked infusions of saline. Specifically, rats were split into pairs: when the “master” rat  
 213 earned an infusion of oxycodone, this triggered a time-matched infusion of saline into the  
 214 “yoked” rat. There was no significant difference between rbTBI and sham rats in oxycodone  
 215 self-administration as measured by active lever presses during each FR phase (main and  
 216 interaction effects of rbTBI all  $\eta^2<0.065, p>0.21$ ; Fig 2A) or number of infusions earned during  
 217 the FR-2 phase (main and interaction effects of rbTBI both  $\eta^2<0.045, p>0.26$ ; Fig 2C) or the FR-  
 218 4 phase (main and interaction effects of rbTBI all  $\eta^2<0.083, p>0.16$ ; Fig 2D). There was also no  
 219 significant difference in lever pressing between rbTBI and sham rats in the yoked saline groups  
 220 (main and interaction effects of rbTBI both  $\eta^2<0.016, p>0.67$ ; Fig 2B). This demonstrates that  
 221 rbTBI does not lead to generalized deficits in extinction learning (i.e., extinction of sucrose pellet  
 222 seeking); a significant finding considering that we have previously reported that rbTBI resulted  
 223 in elevated oxycodone seeking in extinction conditions<sup>17</sup> and several studies have found that  
 224 mild TBI impaired extinction of conditioned fear<sup>25-28</sup>. Despite the lack of significant difference  
 225 in oxycodone self-administration, there was a trend for elevated drug seeking by rbTBI rats  
 226 relative to sham rats ( $t(20)=1.5, d=0.64, p=0.15$ ). This trend was similar in effect size to our  
 227 previous report on the first day of oxycodone seeking using the same injury and oxycodone self-  
 228 administration model ( $d=0.80$ )<sup>17</sup>.  
 229

**A**

| Week | Experiment Phase                     |
|------|--------------------------------------|
| 0    | Repeated Blast Injury                |
| 1    | Handling                             |
| 2    | Jugular Catheterization Surgery      |
| 3    | Food Self-Administration             |
| 4    | Oxycodone Self-Administration (FR-2) |
| 5    | Oxycodone Self-Administration (FR-4) |
| 6    | Oxycodone Seeking                    |
| 7    | MRI                                  |

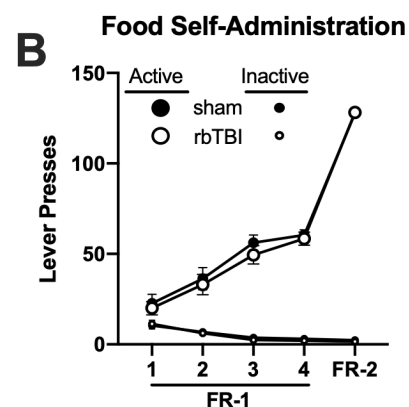

231

Figure 1: A) Experimental timeline. B) Acquisition of food self-administration in sham and rbTBI mice.

232

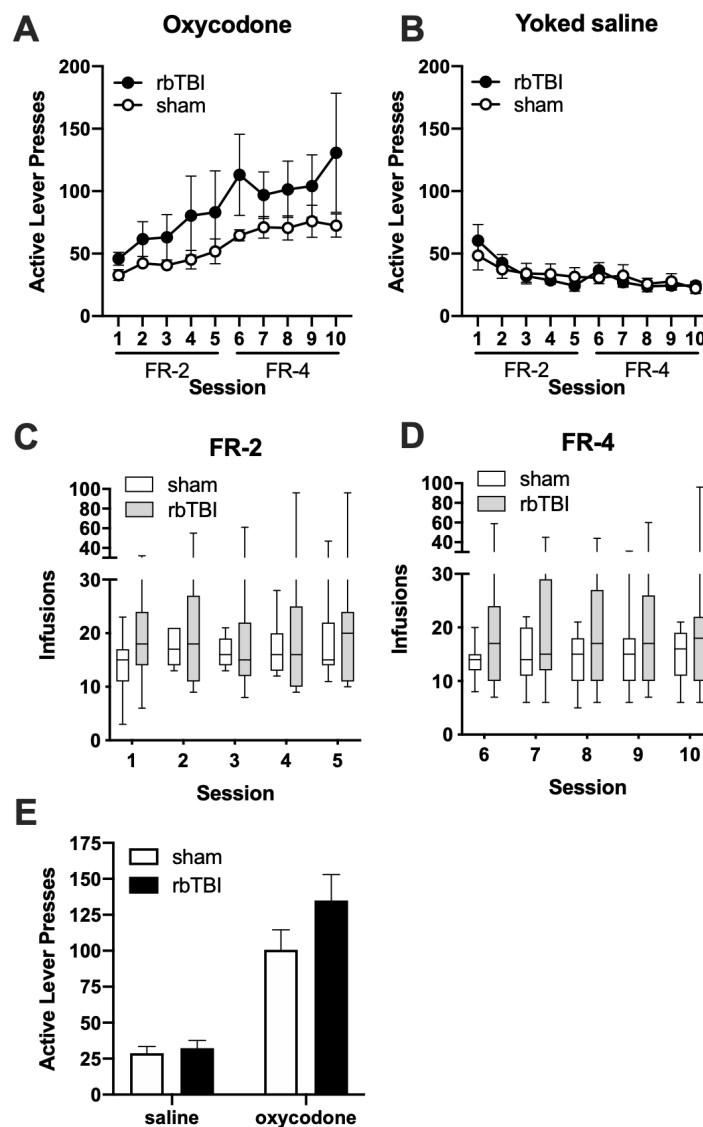

233

234 Figure 2: Oxycodone self-administration and seeking. A) Active lever responses for oxycodone. B) Active lever responses in rats  
 235 that received yoked saline infusions. C, D) Oxycodone infusions earned during FR-2 (C) and FR-4 (D) sessions. E) Active presses  
 236 during extinction trial. Boxes represent median and quartiles, whiskers represent range. Bars represent mean  $\pm$  SEM.

237

238

239 *MRI*

240 To examine neuroimaging correlates of injury and oxycodone self-administration, rats underwent  
 241 structural and functional MRI at 7-weeks post-injury, approximately 10 days following cessation  
 242 of oxycodone self-administration.

243

244 Structural MRI



245 Structural assessment was performed by examining T2, T2\*3D, fractional anisotropy (FA), and  
246 mean diffusivity (MD).

247

#### 248 Factorial analysis of fractional anisotropy and mean diffusivity

249 We examined main and interactive effects of rbTBI and oxycodone self-administration on  
250 microstructure of the prefrontal cortex and nucleus accumbens. These brain regions are engaged  
251 during drug craving in human opioid users and drug seeking behaviors in rodent models of  
252 opioid addiction<sup>15, 29, 30</sup>. These areas are also subject to damage in human blast and non-blast  
253 mild TBI<sup>31-34</sup>. There were no significant main effects of injury or oxycodone, but a significant  
254 interaction was found in the FA of both hemispheres of the nucleus accumbens ( $p \leq 0.05$ ).

255

#### 256 Relationship between fractional anisotropy and drug seeking

257 We have previously demonstrated that bTBI lead to changes in hippocampal FA that correlated  
258 with spatial learning deficits<sup>13</sup>. To examine the possibility that mPFC FA was associated with  
259 drug seeking, we performed correlational analyses between FA in the subregions of the  
260 prefrontal cortex (PFC) and nucleus accumbens (NAc) and active lever presses during the drug  
261 seeking session. We examined sham and rbTBI rats separately and together to determine if  
262 associations were specific to injured rats or if associations generalized to both populations.  
263 Significant associations were only found in the subregions of the mPFC ipsilateral to injury (Fig  
264 3). In the prelimbic PFC (PrL), there were significant linear correlations in the rbTBI group  
265 ( $r^2=41$ ,  $p=0.047$ ) and across injury groups ( $r^2=23$ ,  $p=0.020$ ), but not in sham injured rats ( $r^2=11$ ,  
266  $p=0.37$ ). In the infralimbic PFC (IL), there was only a significant association between FA and  
267 drug seeking when the sham and injury groups were combined ( $r^2=22$ ,  $p=0.046$ ). To determine if  
268 this association was explained by the amount of oxycodone intake during prior self-  
269 administration sessions, we examined the correlations between the PFC/NAc and drug intake  
270 (Table 1). There was no association between either ipsilateral subregion and drug intake  
271 (Pearson's  $r$  and Spearman's  $\rho$  all  $< 0.48$ ), however, there was a positive linear association  
272 between the contralateral IL and prior oxycodone intake in rbTBI ( $\rho=0.65$ ,  $p=0.049$ ) and in  
273 combined sham and injury rats ( $\rho=0.59$ ,  $p=0.0084$ ). These data suggest that the association  
274 between reduced FA ipsilateral to injury and elevated drug seeking is not due to the amount of  
275 oxycodone self-administered, and that there is a positive relationship between total oxycodone  
276 intake and FA in the contralateral IL mPFC.

277

278

279

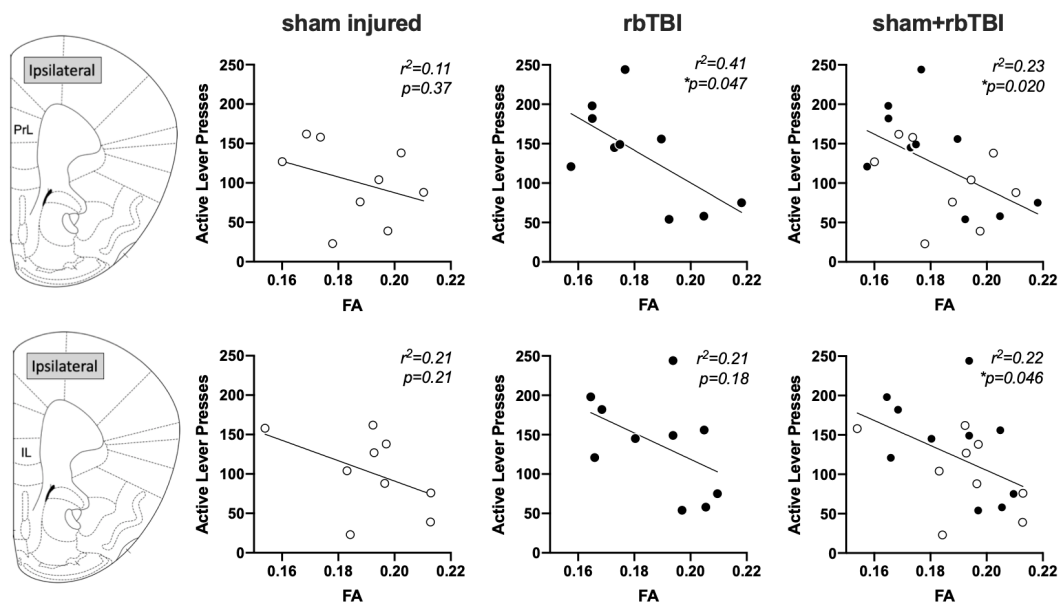

280

281

Figure 3: Correlations between FA and active lever presses in ipsilateral PrL and IL. \* $p \leq 0.05$

282

283

284

285 Table 1: Correlations between structural neuroimaging measures and seeking or intake. FA: fractional anisotropy, MD: mean  
 286 diffusivity. Ipsilateral: left, contralateral: right. Italicized values represent Spearman's rho instead of Pearson's r. \* $p \leq 0.05$   
 287 \*\* $p \leq 0.01$ .

| FA v. Seeking |     | sham  | rbTBI         | sham+rbTBI    | MD v. Seeking |       | sham  | rbTBI | sham+rbTBI |
|---------------|-----|-------|---------------|---------------|---------------|-------|-------|-------|------------|
| Ipsilateral   | PrL | -0.34 | <b>-0.64*</b> | <b>-0.53*</b> | PrL           | 0.42  | -0.05 | 0.12  |            |
|               | IL  | -0.46 | -0.46         | <b>-0.46*</b> | IL            | 0.25  | -0.12 | 0.02  |            |
|               | NAc | 0.30  | -0.42         | -0.19         | NAc           | 0.10  | -0.12 | -0.01 |            |
| Contralateral | PrL | 0.10  | -0.03         | -0.03         | PrL           | 0.03  | -0.07 | 0.11  |            |
|               | IL  | 0.35  | 0.30          | 0.30          | IL            | -0.10 | -0.36 | -0.16 |            |
|               | NAc | -0.26 | -0.37         | -0.26         | NAc           | 0.26  | 0.01  | 0.05  |            |

  

| FA v. Intake  |     | sham  | rbTBI        | sham+rbTBI    | MD v. Intake |       | sham          | rbTBI         | sham+rbTBI |
|---------------|-----|-------|--------------|---------------|--------------|-------|---------------|---------------|------------|
| Ipsilateral   | PrL | -0.03 | -0.32        | -0.31         | PrL          | -0.03 | -0.30         | -0.19         |            |
|               | IL  | -0.48 | -0.36        | -0.36         | IL           | -0.10 | <b>-0.67*</b> | -0.36         |            |
|               | NAc | 0.48  | 0.04         | 0.03          | NAc          | -0.27 | -0.40         | -0.31         |            |
| Contralateral | PrL | 0.15  | 0.05         | 0.16          | PrL          | -0.32 | -0.29         | -0.17         |            |
|               | IL  | 0.39  | <b>0.65*</b> | <b>0.59**</b> | IL           | -0.15 | <b>-0.67*</b> | <b>-0.55*</b> |            |
|               | NAc | 0.11  | 0.07         | 0.01          | NAc          | -0.15 | -0.52         | -0.30         |            |

288

289

### 290 Relationship between mean diffusivity and drug seeking

291 We examined mean diffusivity (MD) to determine if this additional measure of local  
 292 microstructure was associated with oxycodone seeking or intake during self-administration  
 293 (Table 1). No significant associations were found between MD and drug seeking in any region,  
 294 although the MD in both hemispheres of the IL mPFC had a significant negative association with  
 295 oxycodone intake in rbTBI rats ( $\rho = -0.67$ ,  $p = 0.039$  for each hemisphere). Similarly, there was a

296 significant negative association between MD and oxycodone intake when injury groups were  
297 combined ( $\rho=-0.55$ ,  $p=0.014$ ).

298

## 299 Functional MRI

### 300 Regional homogeneity (REHO)

301

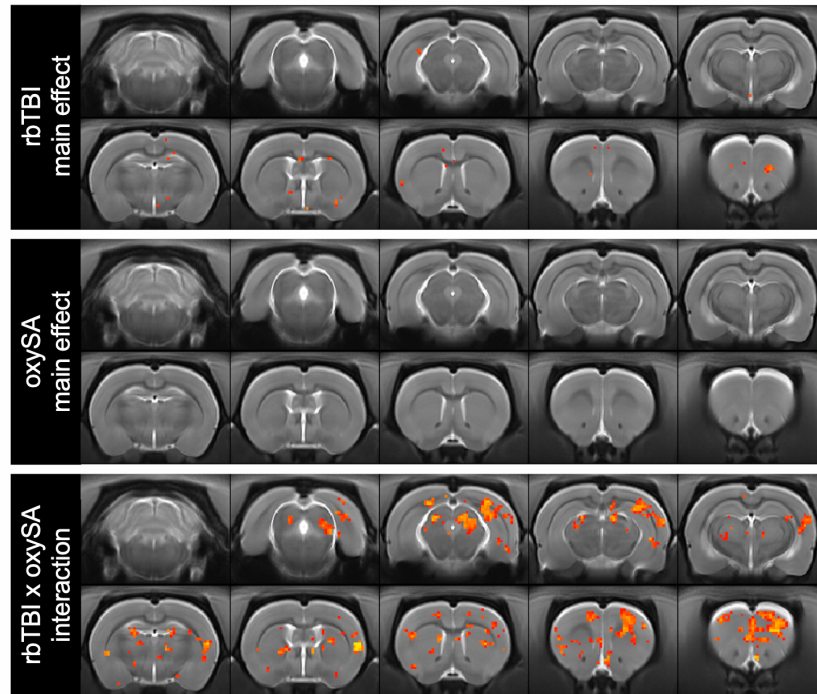

302

303 *Figure 4: Regional homogeneity (REHO) of BOLD signal. Red/yellow voxels represent main or interaction effects at  $p \leq 0.05$ .*

304

### 305 Global functional connectivity

306 Regions of interest were represented as nodes and edges were calculated as the temporal Pearson  
307 correlation coefficient in the BOLD response between pairwise nodes for each of the four  
308 treatment groups (Fig 7). rbTBI/saline and sham/oxycodone self-administration rats showed  
309 comparable patterns of connectivity to sham/saline rats, while rbTBI/oxycodone self-  
310 administration rats had a larger number of connected nodes, as defined by Pearson  $r \geq 0.6$  (Fig 7).  
311 Edge strengths were tested in a factorial design, which also yielded a significant interaction  
312 ( $p \leq 0.05$ ), but no significant main effects (both  $p > 0.62$ ).

313

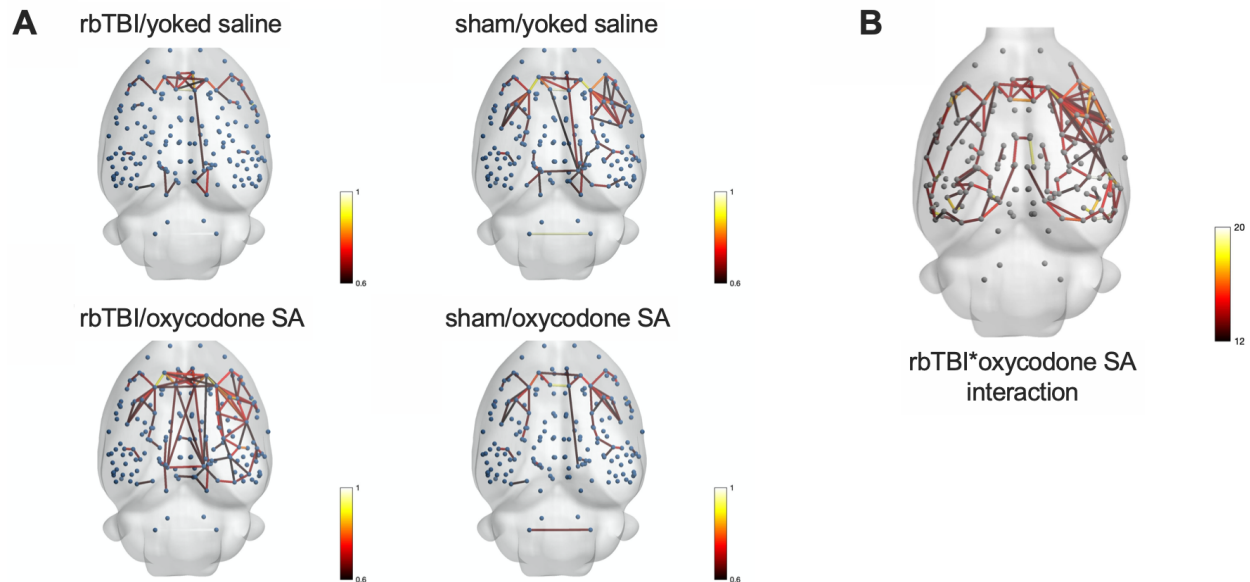

314

315 *Figure 5: Network-based statistics. A) Each node (blue sphere) represents a region of interest, each edge represents a significant*  
316 *correlation between nodes. B) Nodes connected by edges had a significant interaction between rbTBI and oxycodone self-*  
317 *administration. Edges are colored based on Pearson  $r$  values (A) or  $F$  values (B).*

318

### 319 Relationship between functional connectivity and drug seeking

320 Prefrontal-accumbens neurotransmission has been implicated in drug seeking for several drugs  
321 of abuse, including opioids (reviewed in <sup>15, 35, 36</sup>). We tested the hypothesis that functional  
322 connectivity between regions of the PFC and nucleus accumbens would be positively correlated  
323 with oxycodone seeking, and this relationship would be independent of injury.

324 Pairwise correlations were performed on each hemisphere of the PrL, IL, and NAc. Analysis of  
325 the relationship between functional connectivity and drug seeking (active lever presses during  
326 extinction session) found that only the inter-hemispheric connectivity of the IL was significantly  
327 correlated with drug seeking in injured and uninjured rats (Fig 6C). Prefrontal-accumbens  
328 functional connectivity was significantly associated with drug intake on the left hemisphere  
329 (ipsilateral to injury in rbTBI rats), and this was observed in rbTBI and the combined population  
330 of rats (Fig 6E,F).

331

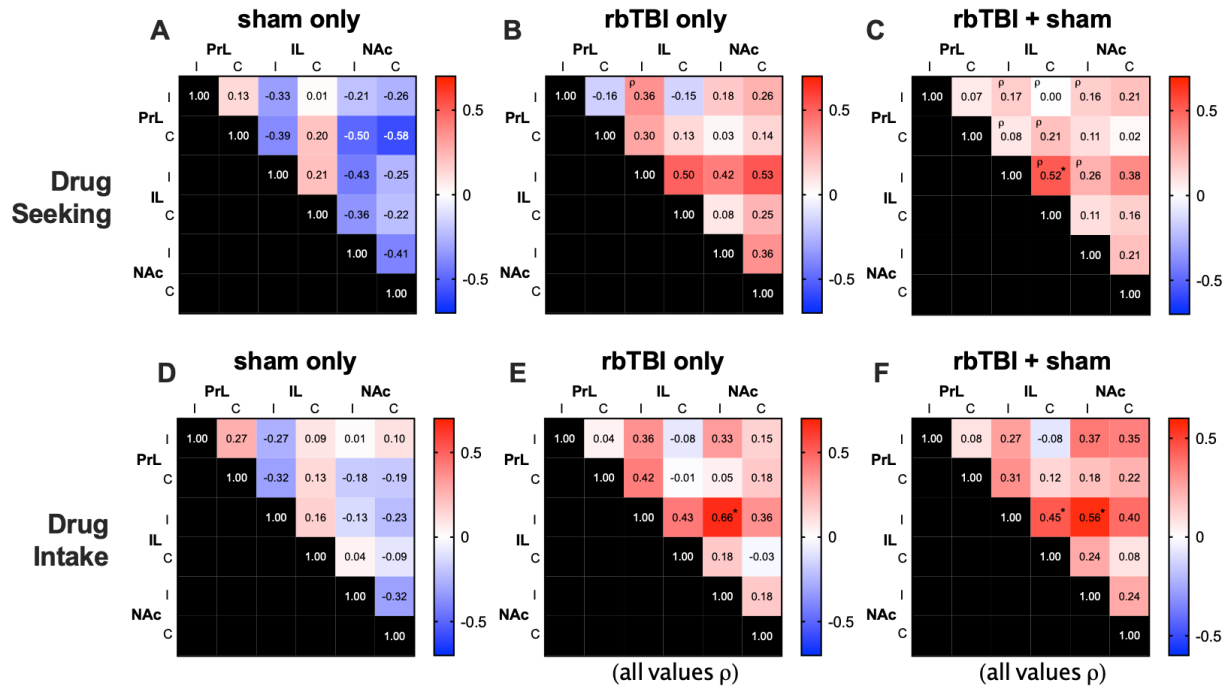

332

333 *Figure 6: Relationship between functional connectivity and drug seeking (A-C) or drug intake (D-F). Values are Pearson  $r$  except*  
 334 *where denoted by  $\rho$ . Significant correlations are identified in bold text. \* $p \leq 0.05$ . I, C: ipsi- or contra-lateral to injury,*  
 335 *corresponding to left or right hemisphere, respectively in all rats.*

336

337

## 338 Discussion

339 We have previously shown that rbTBI-exposed rats had elevated drug seeking following  
 340 oxycodone self-administration despite similar levels of drug intake<sup>17</sup>. In this study, we used  
 341 neuroimaging to explore potential interactive effects and correlates of behavior on structural  
 342 and functional brain networks. We focused on the prefrontal cortex and nucleus accumbens due  
 343 to their known involvement in persistent drug seeking behavior<sup>15, 37, 38</sup>. We found several  
 344 neuroimaging metrics that were associated with drug seeking behavior, prior drug intake, and  
 345 interactive effects of injury and oxycodone self-administration. Microstructural analysis  
 346 identified significant negative associations between FA and drug seeking in the left (but not  
 347 right) PrL and IL PFC, the side ipsilateral to injury in rbTBI rats. There was also a significant  
 348 positive association between FA and drug intake during self-administration in the right  
 349 hemisphere, while the association between MD and prior oxycodone intake was bilateral. The  
 350 effect was largest in rbTBI rats but was also significant in the combined population of injured  
 351 and uninjured rats. Within the NAc, there was a significant interaction between injury and  
 352 oxycodone self-administration on FA, but neither FA nor MD were associated with the amount  
 353 of oxycodone self-administered or subsequent drug seeking. All of the microstructural  
 354 correlations with behavior had larger effects in injured relative to uninjured rats, suggesting that



355 rbTBI enabled or enhanced the emergence of a relationship between structural parameters of the  
356 PFC and prior drug seeking and/or drug intake. Resting state functional connectivity (rsfc)  
357 analyses found a widespread increase in network connectivity only in rats that received injury  
358 and oxycodone SA. There were also significant correlations between IL intra-hemispheric  
359 connectivity and drug seeking, and between ipsilateral IL – NAc connectivity and oxycodone  
360 intake during self-administration. As observed in the structural measures, these effects were  
361 largest in injured animals, suggesting that similar to our structural outcomes, the interaction of  
362 injury and oxycodone exposure enabled the emergence of a relationship between functional  
363 connectivity and prior drug seeking and/or drug intake. An interaction was also measured in  
364 local connectivity: regional homogeneity was minimally affected by injury or oxycodone self-  
365 administration alone, but animals receiving both had marked increases in voxelwise homogeneity  
366 of the medial PFC, NAc, and other areas, such as motor cortex, hippocampus, deep layers of the  
367 superior colliculus, and external cortex of the inferior colliculus.

368  
369 The present study adds to a growing body of preclinical work that has largely demonstrated that  
370 experimental TBI is associated with worse outcomes in models of substance abuse. For example,  
371 studies across different species and TBI models have found elevated alcohol intake following  
372 injury<sup>18, 39-42</sup> (although see<sup>43</sup>). Experimental TBI has also been shown to increase cocaine  
373 conditioned reward<sup>44, 45</sup> and self-administration<sup>46</sup> (although see<sup>20</sup>). In the same model of  
374 repeated blast mild TBI used here, we found that injured animals had reduced oxycodone self-  
375 administration, but drug seeking was elevated during extinction testing<sup>17</sup>. Thus, consistent with  
376 clinical studies that report associations between TBI and substance abuse<sup>4-12</sup>, there is a growing  
377 body of preclinical work that supports a causative role for TBI in elevated addiction liability. In  
378 the current study, we found that drug seeking was elevated after injury and oxycodone SA. We  
379 also found structural and functional changes in the brain, with some of these alterations  
380 associated with prior drug seeking or intake.

381  
382 The significance of injury and opioid exposure has been examined in peripheral and central  
383 injury models. Mu opioid receptor agonists administered after injury lead to longer recovery  
384 times in models of spinal cord injury and neuropathic pain<sup>(47-50)</sup>, while kappa opioid receptor  
385 agonists may be protective<sup>51</sup>. In regard to TBI, the impact of opioid exposure on injury  
386 outcomes is less clear. Fentanyl administered immediately following controlled cortical impact  
387 exacerbated motor and spatial learning deficits within three weeks of injury<sup>52</sup>. In a comparison  
388 of multiple anesthetic agents delivered immediately after controlled cortical impact, morphine  
389 was associated with the worst outcomes on motor performance in the first five days after injury,

390 while fentanyl was associated with the worst performance in the Morris water maze two weeks  
391 following injury<sup>53</sup>. Conversely, there is also evidence that opioids may be protective in  
392 experimental TBI. Morphine given immediately after injury was found to be beneficial in weight  
393 drop TBI-associated deficits in spatial learning ability 30-90 days post-injury<sup>54</sup>. The mu opioid  
394 receptor selective agonist DAMGO delivered i.c.v. immediately prior to injury protected against  
395 beam walk and beam balance deficits in a rat fluid percussion injury model, and these outcomes  
396 were worsened by the mu antagonist beta-funaltrexamine<sup>55</sup>. In the present study, we observed  
397 several interactive effects between rbTBI and oxycodone self-administration consistent with  
398 worse outcomes. In addition to injury exacerbating oxycodone seeking, injury x oxycodone self-  
399 administration interactions on FA were found in the NAc. Functional measures were more  
400 sensitive to interaction effects, with significant effects identified in the mPFC, NAc, and several  
401 other regions in local connectivity (REHO) and widespread functional connectivity.  
402 Furthermore, functional connectivity between the left and right IL mPFC positively correlated  
403 with both oxycodone seeking and intake in the combined analysis of sham and injured rats, and  
404 the left IL-NAc (ipsilateral to injury) connectivity positively correlated with drug intake in  
405 analysis of rbTBI rats alone and when combined with shams. These measurements we taken  
406 following measures of drug seeking – future studies will need to be done in order to determine if  
407 these metrics are predictive of future drug seeking.

408

### 409 *Neuroimaging studies of TBI*

410 Diffusion tensor imaging (DTI) is a sensitive measure to identify microstructural damage  
411 associated with TBI (reviewed in<sup>56-58</sup>). Experimental blast TBI has been shown to lead to  
412 widespread decreases in FA<sup>13</sup>, with closely-spaced repeated blast exposures exacerbating these  
413 effects<sup>59</sup>. DTI measurements also tend to be exacerbate with time post-injury: we have reported  
414 an increase in the volume of microstructural damage between post-injury day 4 and 30<sup>13</sup>, and  
415 Badea et al. have reported greater changes in DTI at 90 days relative to 7 days post-injury<sup>60</sup>.  
416 Another study found region-specific changes in DTI between 1 and 14 days after injury,  
417 reflecting regional differences in time to vasogenic or cytotoxic edema and demyelination<sup>61</sup>.  
418 In the present study, we did not observe a significant effect of rbTBI on FA in the prefrontal  
419 cortex or nucleus accumbens, but we did observe a significant interaction between rbTBI and  
420 oxycodone self-administration in the nucleus accumbens. Despite a main or interactive effect in  
421 the PFC, we did observe correlations between FA and oxycodone seeking that were largely  
422 driven by animals that also experienced rbTBI.

423



424 Changes in rsfc have been observed in human TBI and in experimental TBI. Increased intra-  
425 hemispheric connectivity of the anterior cingulate cortex was found in veterans and athletes that  
426 had experienced a mild TBI <sup>62, 63</sup>, an effect we observed in the PrL (immediately ventral of the  
427 anterior cingulate cortex in the rat). In collegiate athletes, elevated local connectivity (REHO) in  
428 the right middle and superior frontal gyri was associated with clinical symptoms following sports  
429 concussion <sup>64</sup>. Widespread disruptions in functional connectivity have also been associated with  
430 long-term effects of TBI (reviewed in <sup>65-67</sup>). In a study of high school and collegiate football  
431 players, increased widespread rsfc was observed only in athletes that remained symptomatic one  
432 week following injury <sup>68</sup>. Similarly, elevated widespread rsfc was found in adolescent hockey  
433 players at three months following injury, although this effect was greater in recovered athletes  
434 relative to those with fewer symptoms <sup>69</sup>. Combat veterans that sustained blast mild TBI and had  
435 persistent post-concussive symptoms had increased rsfc (assessed by magnetoencephalography)  
436 in several brain regions, including the ventromedial cortex and anterior cingulate cortices <sup>70</sup>.  
437 Similarly, increases in functional connectivity in moderate and severe TBI were found for up to a  
438 year after injury, and the changes were greatest in areas that were already highly connected <sup>71</sup>.  
439 Conversely, other studies using BOLD MRI have reported lower rsfc and/or local connectivity in  
440 injured patients <sup>72, 73</sup>. In a study of TBI across different injury mechanisms, increased local  
441 connectivity was observed, and in a subset of patients, areas of highest connectivity were  
442 colocalized with high [<sup>18</sup>F]AV-1451 binding, a marker of tau hyperphosphorylation <sup>74</sup>. The  
443 authors speculate that this may be associated with vascular neuropathology. Consistent with  
444 many of these studies, we found increased widespread and local connectivity. Similar to our  
445 observation of increased inter-hemispheric connectivity within the mPFC, Kulkarni et al.  
446 reported increased rsfc within PrL and IL after a single closed head momentum exchange injury  
447 <sup>75</sup>.

448

#### 449 *Neuroimaging studies of opioid use*

450 Clinical studies have consistently identified structural and functional changes associated with  
451 opioid abuse. A voxel-based meta-analysis of studies employing DTI found that bilateral  
452 reductions in FA in frontal subgyral regions, including areas impacting the communication  
453 between cingulate and limbic association cortices with prefrontal association cortices <sup>76</sup>. Heroin  
454 dependent individuals were also found to have lower FA in the white matter tract connecting the  
455 mPFC and postcentral gyrus <sup>77</sup> and a comparison of heroin users that relapsed to those that  
456 remained abstinent 6 months after initiation of methadone maintenance therapy found lower FA  
457 in several white matter tracts in the relapse group <sup>78</sup>. In a neuroimaging study of over 150  
458 subjects, increased widespread structural connectivity was reported in abstinent heroin users

459 relative to non-heroin using controls <sup>79</sup>. In this study, white matter FA was increased in heroin  
460 users, and FA within frontal networks was correlated with daily heroin intake <sup>79</sup>.

461

462 Opioid use and abstinence have also been associated with altered functional neuroimaging  
463 measures in human populations. In a study of former heroin users undergoing methadone  
464 maintenance, those that relapsed had elevated REHO in medial orbital cortex and the right  
465 caudate nucleus, and elevated REHO in the caudate was correlated with relapse rates <sup>80</sup>. In  
466 contrast, methadone maintained former heroin users had lower REHO in the medial orbital  
467 cortex compared to control subjects without a history of heroin or methadone use <sup>81</sup>. In the  
468 present study, we found that rats receiving rbTBI and oxycodone self-administration had  
469 elevated REHO in several prefrontal regions, including medial and lateral orbital cortex. A trace  
470 of this effect was evident in the orbital cortex from blast alone, but we observed no indication of  
471 this in animals exposed to oxycodone only. Differences between our preclinical data and the  
472 aforementioned clinical data may arise from the interactive effects of the oxycodone and injury,  
473 the lack of opioid maintenance therapy in our rodent study, or other experimental differences.  
474 Zhou et al. found increased functional connectivity between the ventromedial PFC and nucleus  
475 accumbens in former heroin users with  $\geq 3$  years of abstinence <sup>82</sup>, similar to findings of  
476 increased functional connectivity between ventral/rostral anterior cingulate cortex and the  
477 nucleus accumbens <sup>83</sup>. Increased widespread functional connectivity has been also been reported  
478 in heroin use during abstinence <sup>84</sup>, although there are also findings of decreased rsfc in opioid  
479 addiction, especially when examining connectivity within an executive network (reviewed in <sup>85</sup>,  
480 <sup>86</sup>). In conclusion, we find evidence that repeated mild TBI and oxycodone interact in such a way  
481 that manifests as elevated drug seeking, increased microstructural damage, and widespread  
482 aberrant functional connectivity. Repeated blast mild TBI also increased the effect sizes of many  
483 relationships between the neuroimaging findings and prior drug seeking and/or intake.

484

485

486

487

## 488 **Acknowledgements**

489 This research was supported by National Institute on Drug Abuse Grant DA039276, United  
490 States Department of Veteran Affairs grant RX002931 and the Research and Education Initiative  
491 Fund, a component of the Advancing a Healthier Wisconsin Endowment at the Medical College  
492 of Wisconsin. The content is solely the responsibility of the authors and does not necessarily  
493 represent the official views of the National Institutes of Health.

494

## 495    **References**

- 496    1. Taylor, C.A., Bell, J.M., Breiding, M.J. and Xu, L. (2017). Traumatic Brain Injury-Related  
497    Emergency Department Visits, Hospitalizations, and Deaths - United States, 2007 and 2013.  
498    MMWR Surveillance Summaries 66, 1-16.
- 499    2. Scholl, L., Seth, P., Kariisa, M., Wilson, N. and Baldwin, G. (2019). Drug and Opioid-Involved  
500    Overdose Deaths — United States, 2013–2017. MMWR Morb Mortal Wkly Rep 67, 1419-1427.
- 501    3. Tanielian, T. and Jaycox, L.H. (eds) 2008. Invisible wounds of war: Psychological and cognitive  
502    injuries, their consequences, and services to assist recovery. Rand Corporation
- 503    4. Fann, J.R., Burington, B., Leonetti, A., Jaffe, K., Katon, W.J. and Thompson, R.S. (2004).  
504    Psychiatric illness following traumatic brain injury in an adult health maintenance organization  
505    population. Archives of general psychiatry 61, 53-61.
- 506    5. Miller, S.C., Baktash, S.H., Webb, T.S., Whitehead, C.R., Maynard, C., Wells, T.S., Otte, C.N.  
507    and Gore, R.K. (2013). Risk for addiction-related disorders following mild traumatic brain injury  
508    in a large cohort of active-duty U.S. airmen. The American journal of psychiatry 170, 383-390.
- 509    6. West, S.L. (2011). Substance use among persons with traumatic brain injury: a review.  
510    NeuroRehabilitation 29, 1-8.
- 511    7. McKinlay, A., Grace, R., Horwood, J., Fergusson, D. and MacFarlane, M. (2009). Adolescent  
512    psychiatric symptoms following preschool childhood mild traumatic brain injury: evidence from  
513    a birth cohort. The Journal of head trauma rehabilitation 24, 221-227.
- 514    8. Kreutzer, J.S., Wehman, P.H., Harris, J.A., Burns, C.T. and Young, H.F. (1991). Substance abuse  
515    and crime patterns among persons with traumatic brain injury referred for supported  
516    employment. Brain injury : [BI] 5, 177-187.
- 517    9. Corrigan, J.D. (1995). Substance abuse as a mediating factor in outcome from traumatic brain  
518    injury. Archives of physical medicine and rehabilitation 76, 302-309.
- 519    10. Bjork, J.M. and Grant, S.J. (2009). Does traumatic brain injury increase risk for substance  
520    abuse? Journal of neurotrauma 26, 1077-1082.
- 521    11. Adams, R.S., Corrigan, J.D. and Dams-O'Connor, K. (2019). Opioid Use among Individuals  
522    with Traumatic Brain Injury: A Perfect Storm? Journal of neurotrauma.
- 523    12. Corrigan, J.D. and Adams, R.S. (2019). The intersection of lifetime history of traumatic brain  
524    injury and the opioid epidemic. Addict Behav 90, 143-145.
- 525    13. Budde, M.D., Shah, A., McCrea, M., Cullinan, W.E., Pintar, F.A. and Stemper, B.D. (2013).  
526    Primary blast traumatic brain injury in the rat: relating diffusion tensor imaging and behavior.  
527    Frontiers in neurology 4, 154.
- 528    14. Koob, G.F. and Volkow, N.D. (2016). Neurobiology of addiction: a neurocircuitry analysis.  
529    Lancet Psychiatry 3, 760-773.
- 530    15. Reiner, D.J., Fredriksson, I., Lofaro, O.M., Bossert, J.M. and Shaham, Y. (2019). Relapse to  
531    opioid seeking in rat models: behavior, pharmacology and circuits. Neuropsychopharmacology  
532    44, 465-477.
- 533    16. Wilson, S.J., Sayette, M.A. and Fiez, J.A. (2004). Prefrontal responses to drug cues: a  
534    neurocognitive analysis. Nat Neurosci 7, 211-214.
- 535    17. Nawarawong, N.N., Slaker, M., Muelbl, M., Shah, A.S., Chiariello, R., Nelson, L.D., Budde,  
536    M.D., Stemper, B.D. and Olsen, C.M. (2018). Repeated blast model of mild traumatic brain  
537    injury alters oxycodone self-administration and drug seeking. The European journal of  
538    neuroscience.
- 539    18. Lim, Y.W., Meyer, N.P., Shah, A.S., Budde, M.D., Stemper, B.D. and Olsen, C.M. (2015).  
540    Voluntary Alcohol Intake following Blast Exposure in a Rat Model of Mild Traumatic Brain Injury.  
541    PLoS One 10, e0125130.

- 542 19. Stemper, B.D., Shah, A.S., Budde, M.D., Olsen, C.M., Glavaski-Joksimovic, A., Kurpad, S.N.,  
543 McCrea, M. and Pintar, F.A. (2016). Behavioral Outcomes Differ between Rotational  
544 Acceleration and Blast Mechanisms of Mild Traumatic Brain Injury. *Frontiers in neurology* 7.  
545 20. Muelbl, M.J., Slaker, M.L., Shah, A.S., Nawarawong, N.N., Gerndt, C.H., Budde, M.D.,  
546 Stemper, B.D. and Olsen, C.M. (2018). Effects of Mild Blast Traumatic Brain Injury on Cognitive-  
547 and Addiction-Related Behaviors. *Sci Rep* 8, 9941.
- 548 21. Ikegami, A., Olsen, C.M., Fleming, S.M., Guerra, E.E., Bittner, M.A., Wagner, J. and  
549 Duvauchelle, C.L. (2002). Intravenous ethanol/cocaine self-administration initiates high intake  
550 of intravenous ethanol alone. *Pharmacology, biochemistry, and behavior* 72, 787-794.
- 551 22. Skinner, N.P., Kurpad, S.N., Schmit, B.D., Tugan Muftuler, L. and Budde, M.D. (2017). Rapid  
552 in vivo detection of rat spinal cord injury with double-diffusion-encoded magnetic resonance  
553 spectroscopy. *Magnetic resonance in medicine : official journal of the Society of Magnetic  
554 Resonance in Medicine / Society of Magnetic Resonance in Medicine* 77, 1639-1649.
- 555 23. Basser, P.J., Mattiello, J. and LeBihan, D. (1994). Estimation of the effective self-diffusion  
556 tensor from the NMR spin echo. *J Magn Reson B* 103, 247-254.
- 557 24. Vonder Haar, C. and Winstanley, C.A. (2016). Minor Functional Deficits in Basic Response  
558 Patterns for Reinforcement after Frontal Traumatic Brain Injury in Rats. *Journal of neurotrauma*  
559 33, 1892-1900.
- 560 25. Schneider, B.L., Ghoddoussi, F., Charlton, J.L., Kohler, R.J., Galloway, M.P., Perrine, S.A. and  
561 Conti, A.C. (2016). Increased Cortical Gamma-Aminobutyric Acid Precedes Incomplete  
562 Extinction of Conditioned Fear and Increased Hippocampal Excitatory Tone in a Mouse Model  
563 of Mild Traumatic Brain Injury. *Journal of neurotrauma* 33, 1614-1624.
- 564 26. Zhao, J., Huynh, J., Hylin, M.J., O'Malley, J.J., Perez, A., Moore, A.N. and Dash, P.K. (2018).  
565 Mild Traumatic Brain Injury Reduces Spine Density of Projection Neurons in the Medial  
566 Prefrontal Cortex and Impairs Extinction of Contextual Fear Memory. *Journal of neurotrauma*  
567 35, 149-156.
- 568 27. Cheng, W.H., Martens, K.M., Bashir, A., Cheung, H., Stukas, S., Gibbs, E., Namjoshi, D.R.,  
569 Button, E.B., Wilkinson, A., Barron, C.J., Cashman, N.R., Cripton, P.A. and Wellington, C.L.  
570 (2019). CHIMERA repetitive mild traumatic brain injury induces chronic behavioural and  
571 neuropathological phenotypes in wild-type and APP/PS1 mice. *Alzheimer's research & therapy*  
572 11, 6.
- 573 28. Davies, D.R., Olson, D., Meyer, D.L., Scholl, J.L., Watt, M.J., Manzerra, P., Renner, K.J. and  
574 Forster, G.L. (2016). Mild Traumatic Brain Injury with Social Defeat Stress Alters Anxiety,  
575 Contextual Fear Extinction, and Limbic Monoamines in Adult Rats. *Frontiers in behavioral  
576 neuroscience* 10, 71.
- 577 29. Langleben, D.D., Ruparel, K., Elman, I., Loughead, J.W., Busch, E.L., Cornish, J., Lynch, K.G.,  
578 Nuwayser, E.S., Childress, A.R. and O'Brien, C.P. (2014). Extended-release naltrexone modulates  
579 brain response to drug cues in abstinent heroin-dependent patients. *Addict Biol* 19, 262-271.
- 580 30. Li, Q., Li, W., Wang, H., Wang, Y., Zhang, Y., Zhu, J., Zheng, Y., Zhang, D., Wang, L., Li, Y., Yan,  
581 X., Chang, H., Fan, M., Li, Z., Tian, J., Gold, M.S., Wang, W. and Liu, Y. (2015). Predicting  
582 subsequent relapse by drug-related cue-induced brain activation in heroin addiction: an event-  
583 related functional magnetic resonance imaging study. *Addict Biol* 20, 968-978.
- 584 31. Hoffman, S.W. and Harrison, C. (2009). The interaction between psychological health and  
585 traumatic brain injury: a neuroscience perspective. *The Clinical neuropsychologist* 23, 1400-  
586 1415.
- 587 32. Taylor, P.A. and Ford, C.C. (2009). Simulation of blast-induced early-time intracranial wave  
588 physics leading to traumatic brain injury. *Journal of biomechanical engineering* 131, 061007.
- 589 33. Mu, W., Catenaccio, E. and Lipton, M.L. (2017). Neuroimaging in Blast-Related Mild  
590 Traumatic Brain Injury. *The Journal of head trauma rehabilitation* 32, 55-69.

- 591 34. Eierud, C., Craddock, R.C., Fletcher, S., Aulakh, M., King-Casas, B., Kuehl, D. and LaConte,  
592 S.M. (2014). Neuroimaging after mild traumatic brain injury: review and meta-analysis.  
593 *NeuroImage: Clinical* 4, 283-294.
- 594 35. Kalivas, P.W. and Volkow, N.D. (2005). The neural basis of addiction: a pathology of  
595 motivation and choice. *The American journal of psychiatry* 162, 1403-1413.
- 596 36. Dong, Y., Taylor, J.R., Wolf, M.E. and Shaham, Y. (2017). Circuit and Synaptic Plasticity  
597 Mechanisms of Drug Relapse. *Journal of Neuroscience* 37, 10867-10876.
- 598 37. Kalivas, P.W., Peters, J. and Knackstedt, L. (2006). Animal models and brain circuits in drug  
599 addiction. *Mol Interv* 6, 339-344.
- 600 38. Peters, J., Kalivas, P.W. and Quirk, G.J. (2009). Extinction circuits for fear and addiction  
601 overlap in prefrontal cortex. *Learning & memory* 16, 279-288.
- 602 39. Mayeux, J.P., Teng, S.X., Katz, P.S., Gilpin, N.W. and Molina, P.E. (2015). Traumatic brain  
603 injury induces neuroinflammation and neuronal degeneration that is associated with escalated  
604 alcohol self-administration in rats. *Behavioural brain research* 279, 22-30.
- 605 40. Weil, Z.M., Karelina, K., Gaier, K.R., Corrigan, T.E. and Corrigan, J.D. (2016). Juvenile  
606 Traumatic Brain Injury Increases Alcohol Consumption and Reward in Female Mice. *Journal of*  
607 *neurotrauma* 33, 895-903.
- 608 41. Weil, Z.M., Corrigan, J.D. and Karelina, K. (2016). Alcohol abuse after traumatic brain injury:  
609 Experimental and clinical evidence. *Neuroscience & Biobehavioral Reviews* 62, 89-99.
- 610 42. Karelina, K., Nicholson, S. and Weil, Z.M. (2018). Minocycline blocks traumatic brain injury-  
611 induced alcohol consumption and nucleus accumbens inflammation in adolescent male mice.  
612 *Brain, behavior, and immunity* 69, 532-539.
- 613 43. Lowing, J.L., Susick, L.L., Caruso, J.P., Provenzano, A.M., Raghupathi, R. and Conti, A.C.  
614 (2014). Experimental traumatic brain injury alters ethanol consumption and sensitivity. *Journal*  
615 *of neurotrauma* 31, 1700-1710.
- 616 44. Merkel, S.F., Andrews, A.M., Lutton, E.M., Razmpour, R., Cannella, L.A. and Ramirez, S.H.  
617 (2017). Dexamethasone Attenuates the Enhanced Rewarding Effects of Cocaine Following  
618 Experimental Traumatic Brain Injury. *Cell Transplant* 26, 1178-1192.
- 619 45. Merkel, S.F., Razmpour, R., Lutton, E.M., Tallarida, C.S., Heldt, N.A., Cannella, L.A., Persidsky,  
620 Y., Rawls, S.M. and Ramirez, S.H. (2017). Adolescent Traumatic Brain Injury Induces Chronic  
621 Mesolimbic Neuroinflammation with Concurrent Enhancement in the Rewarding Effects of  
622 Cocaine in Mice during Adulthood. *Journal of neurotrauma* 34, 165-181.
- 623 46. Vonder Haar, C., Ferland, J.N., Kaur, S., Riparip, L.K., Rosi, S. and Winstanley, C.A. (2019).  
624 Cocaine self-administration is increased after frontal traumatic brain injury and associated with  
625 neuroinflammation. *The European journal of neuroscience* 50, 2134-2145.
- 626 47. Grace, P.M., Strand, K.A., Galer, E.L., Urban, D.J., Wang, X., Baratta, M.V., Fabisiak, T.J.,  
627 Anderson, N.D., Cheng, K., Greene, L.I., Berkelhammer, D., Zhang, Y., Ellis, A.L., Yin, H.H.,  
628 Campeau, S., Rice, K.C., Roth, B.L., Maier, S.F. and Watkins, L.R. (2016). Morphine paradoxically  
629 prolongs neuropathic pain in rats by amplifying spinal NLRP3 inflammasome activation. *Proc*  
630 *Natl Acad Sci U S A* 113, E3441-3450.
- 631 48. Grace, P.M., Galer, E.L., Strand, K.A., Corrigan, K., Berkelhammer, D., Maier, S.F. and  
632 Watkins, L.R. (2019). Repeated Morphine Prolongs Postoperative Pain in Male Rats. *Anesthesia*  
633 *and analgesia* 128, 161-167.
- 634 49. Gaudet, A.D., Ayala, M.T., Schleicher, W.E., Smith, E.J., Bateman, E.M., Maier, S.F. and  
635 Watkins, L.R. (2017). Exploring acute-to-chronic neuropathic pain in rats after contusion spinal  
636 cord injury. *Exp Neurol* 295, 46-54.
- 637 50. Loram, L.C., Grace, P.M., Strand, K.A., Taylor, F.R., Ellis, A., Berkelhammer, D., Bowlin, M.,  
638 Skarda, B., Maier, S.F. and Watkins, L.R. (2012). Prior exposure to repeated morphine



- 639 potentiates mechanical allodynia induced by peripheral inflammation and neuropathy. *Brain,*  
640 behavior, and immunity 26, 1256-1264.
- 641 51. Hall, E.D., Wolf, D.L., Althaus, J.S. and Von Voigtlander, P.F. (1987). Beneficial effects of the  
642 kappa opioid receptor agonist U-50488H in experimental acute brain and spinal cord injury.  
643 *Brain research* 435, 174-180.
- 644 52. Statler, K.D., Kochanek, P.M., Dixon, C.E., Alexander, H.L., Warner, D.S., Clark, R.S.,  
645 Wisniewski, S.R., Graham, S.H., Jenkins, L.W., Marion, D.W. and Safar, P.J. (2000). Isoflurane  
646 improves long-term neurologic outcome versus fentanyl after traumatic brain injury in rats.  
647 *Journal of neurotrauma* 17, 1179-1189.
- 648 53. Statler, K.D., Alexander, H., Vagni, V., Dixon, C.E., Clark, R.S., Jenkins, L. and Kochanek, P.M.  
649 (2006). Comparison of seven anesthetic agents on outcome after experimental traumatic brain  
650 injury in adult, male rats. *Journal of neurotrauma* 23, 97-108.
- 651 54. Zohar, O., Getslev, V., Miller, A.L., Schreiber, S. and Pick, C.G. (2006). Morphine protects for  
652 head trauma induced cognitive deficits in mice. *Neurosci Lett* 394, 239-242.
- 653 55. Lyeth, B.G., Jiang, J.Y., Gong, Q.Z., Hamm, R.J. and Young, H.F. (1995). Effects of mu opioid  
654 agonist and antagonist on neurological outcome following traumatic brain injury in the rat.  
655 *Neuropeptides* 29, 11-19.
- 656 56. Barkhoudarian, G., Hovda, D.A. and Giza, C.C. (2011). The molecular pathophysiology of  
657 concussive brain injury. *Clin Sports Med* 30, 33-48, vii-iii.
- 658 57. Niogi, S.N. and Mukherjee, P. (2010). Diffusion tensor imaging of mild traumatic brain  
659 injury. *The Journal of head trauma rehabilitation* 25, 241-255.
- 660 58. Dodd, A.B., Epstein, K., Ling, J.M. and Mayer, A.R. (2014). Diffusion tensor imaging findings  
661 in semi-acute mild traumatic brain injury. *Journal of neurotrauma* 31, 1235-1248.
- 662 59. Calabrese, E., Du, F., Garman, R.H., Johnson, G.A., Riccio, C., Tong, L.C. and Long, J.B. (2014).  
663 Diffusion tensor imaging reveals white matter injury in a rat model of repetitive blast-induced  
664 traumatic brain injury. *Journal of neurotrauma* 31, 938-950.
- 665 60. Badea, A., Kamnakh, A., Anderson, R.J., Calabrese, E., Long, J.B. and Agoston, D.V. (2018).  
666 Repeated mild blast exposure in young adult rats results in dynamic and persistent  
667 microstructural changes in the brain. *NeuroImage: Clinical* 18, 60-73.
- 668 61. Venkatasubramanian, P.N., Keni, P., Gastfield, R., Li, L., Aksenov, D., Sherman, S.A., Bailes, J.,  
669 3rd, Sindelar, B., Finan, J.D., Lee, J., Bailes, J.E. and Wyrwicz, A.M. (2020). Diffusion Tensor  
670 Imaging Detects Acute and Subacute Changes in Corpus Callosum in Blast-Induced Traumatic  
671 Brain Injury. *ASN Neuro* 12, 1759091420922929.
- 672 62. Sheth, C., Rogowska, J., Legarreta, M., McGlade, E. and Yurgelun-Todd, D. (2021). Functional  
673 connectivity of the anterior cingulate cortex in Veterans with mild traumatic brain injury.  
674 *Behavioural brain research* 396, 112882.
- 675 63. Czerniak, S.M., Sikoglu, E.M., Liso Navarro, A.A., McCafferty, J., Eisenstock, J., Stevenson,  
676 J.H., King, J.A. and Moore, C.M. (2015). A resting state functional magnetic resonance imaging  
677 study of concussion in collegiate athletes. *Brain Imaging Behav* 9, 323-332.
- 678 64. Meier, T.B., Giraldo-Chica, M., Espana, L.Y., Mayer, A.R., Harezlak, J., Nencka, A.S., Wang, Y.,  
679 Koch, K.M., Wu, Y.C., Saykin, A.J., Giza, C.C., Goldman, J., DiFiori, J.P., Guskiewicz, K.M., Mihalik,  
680 J.P., Brooks, A., Broglio, S.P., McAllister, T. and McCrea, M.A. (2020). Resting-State fMRI Metrics  
681 in Acute Sport-Related Concussion and Their Association with Clinical Recovery: A Study from  
682 the NCAA-DOD CARE Consortium. *Journal of neurotrauma* 37, 152-162.
- 683 65. Caeyenberghs, K., Verhelst, H., Clemente, A. and Wilson, P.H. (2017). Mapping the  
684 functional connectome in traumatic brain injury: What can graph metrics tell us? *NeuroImage*  
685 160, 113-123.
- 686 66. Hayes, J.P., Bigler, E.D. and Verfaellie, M. (2016). Traumatic Brain Injury as a Disorder of  
687 Brain Connectivity. *J Int Neuropsychol Soc* 22, 120-137.

- 688 67. Sharp, D.J., Scott, G. and Leech, R. (2014). Network dysfunction after traumatic brain injury.  
689 Nat Rev Neurol 10, 156-166.
- 690 68. Kaushal, M., Espana, L.Y., Nencka, A.S., Wang, Y., Nelson, L.D., McCrea, M.A. and Meier, T.B.  
691 (2019). Resting-state functional connectivity after concussion is associated with clinical  
692 recovery. Human brain mapping 40, 1211-1220.
- 693 69. Manning, K.Y., Schranz, A., Bartha, R., Dekaban, G.A., Barreira, C., Brown, A., Fischer, L.,  
694 Asem, K., Doherty, T.J., Fraser, D.D., Holmes, J. and Menon, R.S. (2017). Multiparametric MRI  
695 changes persist beyond recovery in concussed adolescent hockey players. Neurology 89, 2157-  
696 2166.
- 697 70. Huang, M.X., Harrington, D.L., Robb Swan, A., Angeles Quinto, A., Nichols, S., Drake, A.,  
698 Song, T., Diwakar, M., Huang, C.W., Risbrough, V.B., Dale, A., Bartsch, H., Matthews, S., Huang,  
699 J.W., Lee, R.R. and Baker, D.G. (2017). Resting-State Magnetoencephalography Reveals  
700 Different Patterns of Aberrant Functional Connectivity in Combat-Related Mild Traumatic Brain  
701 Injury. Journal of neurotrauma 34, 1412-1426.
- 702 71. Hillary, F.G., Rajtmajer, S.M., Roman, C.A., Medaglia, J.D., Slocomb-Dluzen, J.E., Calhoun,  
703 V.D., Good, D.C. and Wylie, G.R. (2014). The rich get richer: brain injury elicits hyperconnectivity  
704 in core subnetworks. PLoS One 9, e104021.
- 705 72. Vakhtin, A.A., Calhoun, V.D., Jung, R.E., Prestopnik, J.L., Taylor, P.A. and Ford, C.C. (2013).  
706 Changes in intrinsic functional brain networks following blast-induced mild traumatic brain  
707 injury. Brain injury : [BI] 27, 1304-1310.
- 708 73. Robinson, M.E., Lindemer, E.R., Fonda, J.R., Milberg, W.P., McGlinchey, R.E. and Salat, D.H.  
709 (2015). Close-range blast exposure is associated with altered functional connectivity in Veterans  
710 independent of concussion symptoms at time of exposure. Human brain mapping 36, 911-922.
- 711 74. Wooten, D.W., Ortiz-Teran, L., Zubcevik, N., Zhang, X., Huang, C., Sepulcre, J., Atassi, N.,  
712 Johnson, K.A., Zafonte, R.D. and El Fakhri, G. (2019). Multi-Modal Signatures of Tau Pathology,  
713 Neuronal Fiber Integrity, and Functional Connectivity in Traumatic Brain Injury. Journal of  
714 neurotrauma 36, 3233-3243.
- 715 75. Kulkarni, P., Morrison, T.R., Cai, X., Iriah, S., Simon, N., Sabrick, J., Neuroth, L. and Ferris, C.F.  
716 (2019). Neuroradiological Changes Following Single or Repetitive Mild TBI. Front Syst Neurosci  
717 13, 34.
- 718 76. Wollman, S.C., Alhassoon, O.M., Stern, M.J., Hall, M.G., Rompogren, J., Kimmel, C.L. and  
719 Perez-Figueroa, A.M. (2015). White matter abnormalities in long-term heroin users: a  
720 preliminary neuroimaging meta-analysis. Am J Drug Alcohol Abuse 41, 133-138.
- 721 77. Ma, X., Qiu, Y., Tian, J., Wang, J., Li, S., Zhan, W., Wang, T., Zeng, S., Jiang, G. and Xu, Y.  
722 (2015). Aberrant default-mode functional and structural connectivity in heroin-dependent  
723 individuals. PLoS One 10, e0120861.
- 724 78. Li, W., Zhu, J., Li, Q., Ye, J., Chen, J., Liu, J., Li, Z., Li, Y., Yan, X., Wang, Y. and Wang, W.  
725 (2016). Brain white matter integrity in heroin addicts during methadone maintenance  
726 treatment is related to relapse propensity. Brain Behav 6, e00436.
- 727 79. Sun, Y., Wang, G.B., Lin, Q.X., Lu, L., Shu, N., Meng, S.Q., Wang, J., Han, H.B., He, Y. and Shi,  
728 J. (2017). Disrupted white matter structural connectivity in heroin abusers. Addict Biol 22, 184-  
729 195.
- 730 80. Chang, H., Li, W., Li, Q., Chen, J., Zhu, J., Ye, J., Liu, J., Li, Z., Li, Y., Shi, M., Wang, Y. and  
731 Wang, W. (2016). Regional homogeneity changes between heroin relapse and non-relapse  
732 patients under methadone maintenance treatment: a resting-state fMRI study. BMC Neurol 16,  
733 145.
- 734 81. Qiu, Y.W., Han, L.J., Lv, X.F., Jiang, G.H., Tian, J.Z., Zhuo, F.Z., Su, H.H., Lin, C.L. and Zhang,  
735 X.L. (2011). Regional homogeneity changes in heroin-dependent individuals: resting-state  
736 functional MR imaging study. Radiology 261, 551-559.



- 737 82. Zou, F., Wu, X., Zhai, T., Lei, Y., Shao, Y., Jin, X., Tan, S., Wu, B., Wang, L. and Yang, Z. (2015).  
738 Abnormal resting-state functional connectivity of the nucleus accumbens in multi-year  
739 abstinent heroin addicts. *Journal of neuroscience research* 93, 1693-1702.
- 740 83. Ma, N., Liu, Y., Li, N., Wang, C.X., Zhang, H., Jiang, X.F., Xu, H.S., Fu, X.M., Hu, X. and Zhang,  
741 D.R. (2010). Addiction related alteration in resting-state brain connectivity. *NeuroImage* 49,  
742 738-744.
- 743 84. Liu, J., Liang, J., Qin, W., Tian, J., Yuan, K., Bai, L., Zhang, Y., Wang, W., Wang, Y., Li, Q., Zhao,  
744 L., Lu, L., von Deneen, K.M., Liu, Y. and Gold, M.S. (2009). Dysfunctional connectivity patterns in  
745 chronic heroin users: an fMRI study. *Neurosci Lett* 460, 72-77.
- 746 85. Pandria, N., Kovatsi, L., Vivas, A.B. and Bamidis, P.D. (2018). Resting-state Abnormalities in  
747 Heroin-dependent Individuals. *Neuroscience* 378, 113-145.
- 748 86. leong, H.F. and Yuan, Z. (2017). Resting-State Neuroimaging and Neuropsychological  
749 Findings in Opioid Use Disorder during Abstinence: A Review. *Front Hum Neurosci* 11, 169.  
750
